# Supplementary material for: Functional Study of cAMP-Dependent Protein Kinase A in Penicillium oxalicum
Source: MDPI journal article supplement (doi:10.3390/jof9121203), 2023-12-16
Supplement: s1 [file s1]

## Supplementary Material

**Journal Name:** *Journal of Fungi*

**Article Title:** Functional study of cAMP-dependent protein kinase A in *Penicillium oxalicum*

**Authors:** Qiuyan Sun<sup>1</sup>, Gen Xu<sup>1</sup>, Xiaobei Li<sup>1</sup>, Shuai Li<sup>1</sup>, Zhilei Jia<sup>1</sup>, Mengdi Yan<sup>1</sup>, Wenchao Chen<sup>1</sup>, Zhimin Shi<sup>1</sup>, Zhonghai Li<sup>1\*</sup>, Mei Chen<sup>1\*\*</sup>

**\* Correspondence:**

Zhonghai Li, [lzhzh@vip.126.com](mailto:lzhzh@vip.126.com), Qilu University of Technology, Shandong Academy of Sciences, Jinan, 250353, P. R. China

Mei Chen, [chenmei\\_16@163.com](mailto:chenmei_16@163.com), Qilu University of Technology, Shandong Academy of Sciences, Jinan, 250353, P. R. China

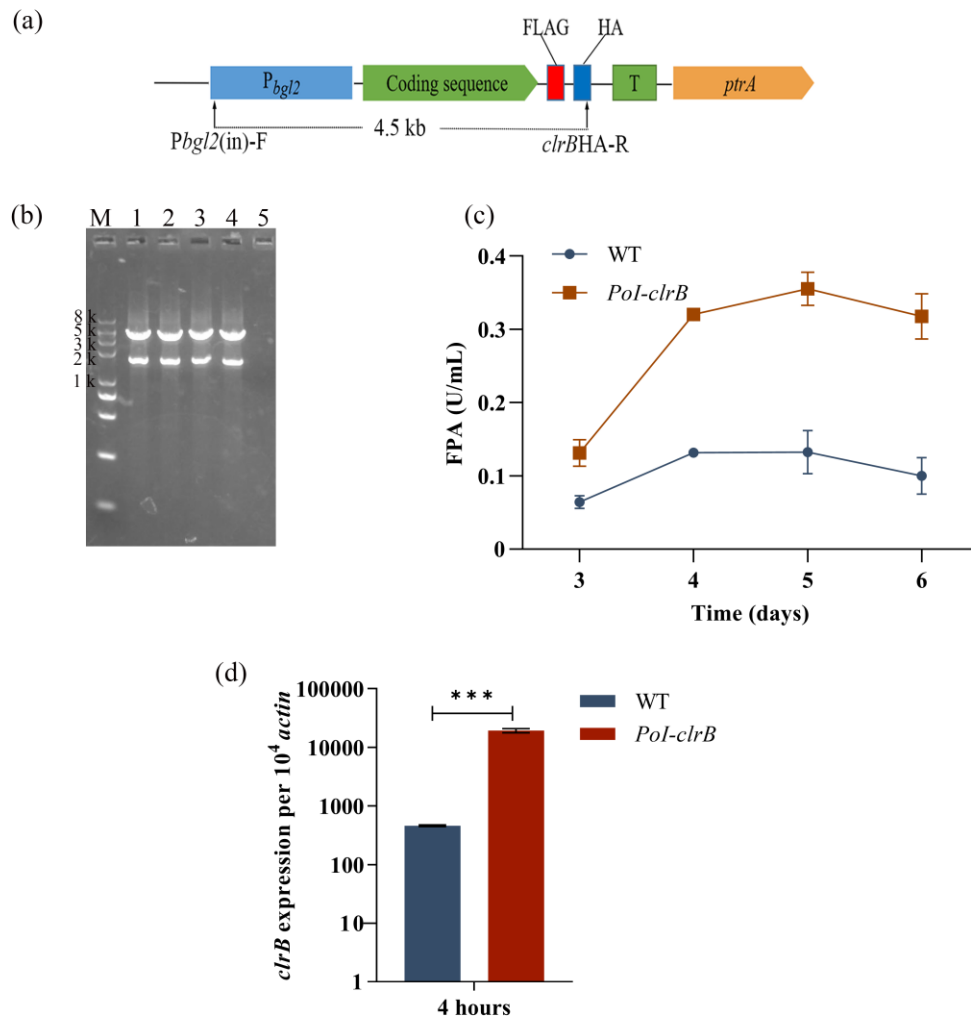

**Figure S1.** Construction and validation of tagged ClrB overexpression strain (a) Construction strategy of *Pol-clrB* strain. (b) *Pol-clrB* was verified by PCR. *Pol-clrB* was verified by the primer P<sub>bgl</sub> (in)-F /clrBHA-R, which was 4.5 kb in size (lanes 1-4); Lane 5 is the *P. oxalicum* 3-15 genome; Lane M is the Trans2K Plus II DNA marker (TransGen Biotech, Beijing, China). (c) Activities of filter paper enzyme of *P. oxalicum* 114-2 and *Pol-clrB*. Activities of filter paper enzyme were measured every 24 hours from 72 hours to 144 hours. (d) RT-qPCR analysis of *clrB* in *P. oxalicum* 114-2 and *Pol-clrB*.

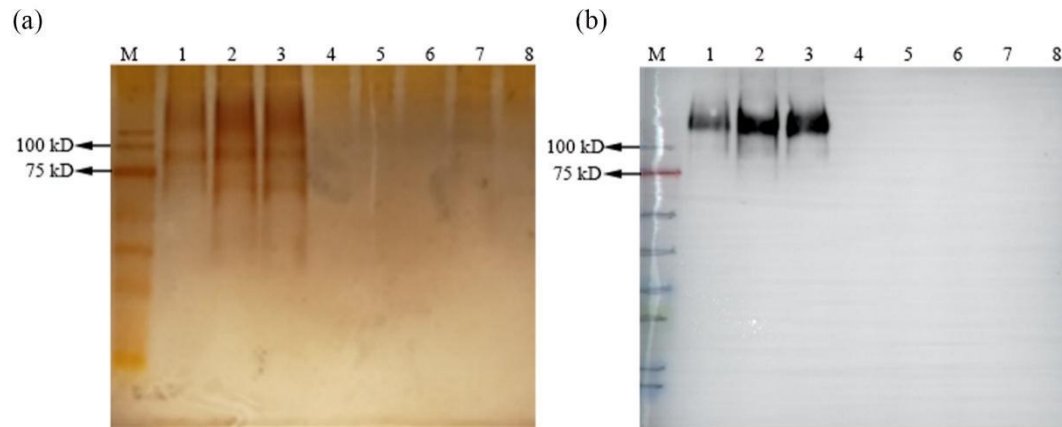

Figure S2. ClrB protein complex silver stain and western blot analysis (a) Results of silver staining. Lanes 1, 2 and 3 are ClrB protein complex anti-Flag eluate; Lanes 4, 5 and 6 are ClrB protein complex anti-HA eluate; Lanes 7 and 8 are *P. oxalicum* 114-2 eluate. (b) Western blot analysis. Lanes 1, 2 and 3 are ClrB protein complex anti-Flag eluate; Lanes 4, 5 and 6 are ClrB protein complex anti-HA eluate; Lanes 7 and 8 are *P. oxalicum* 114-2 eluate.

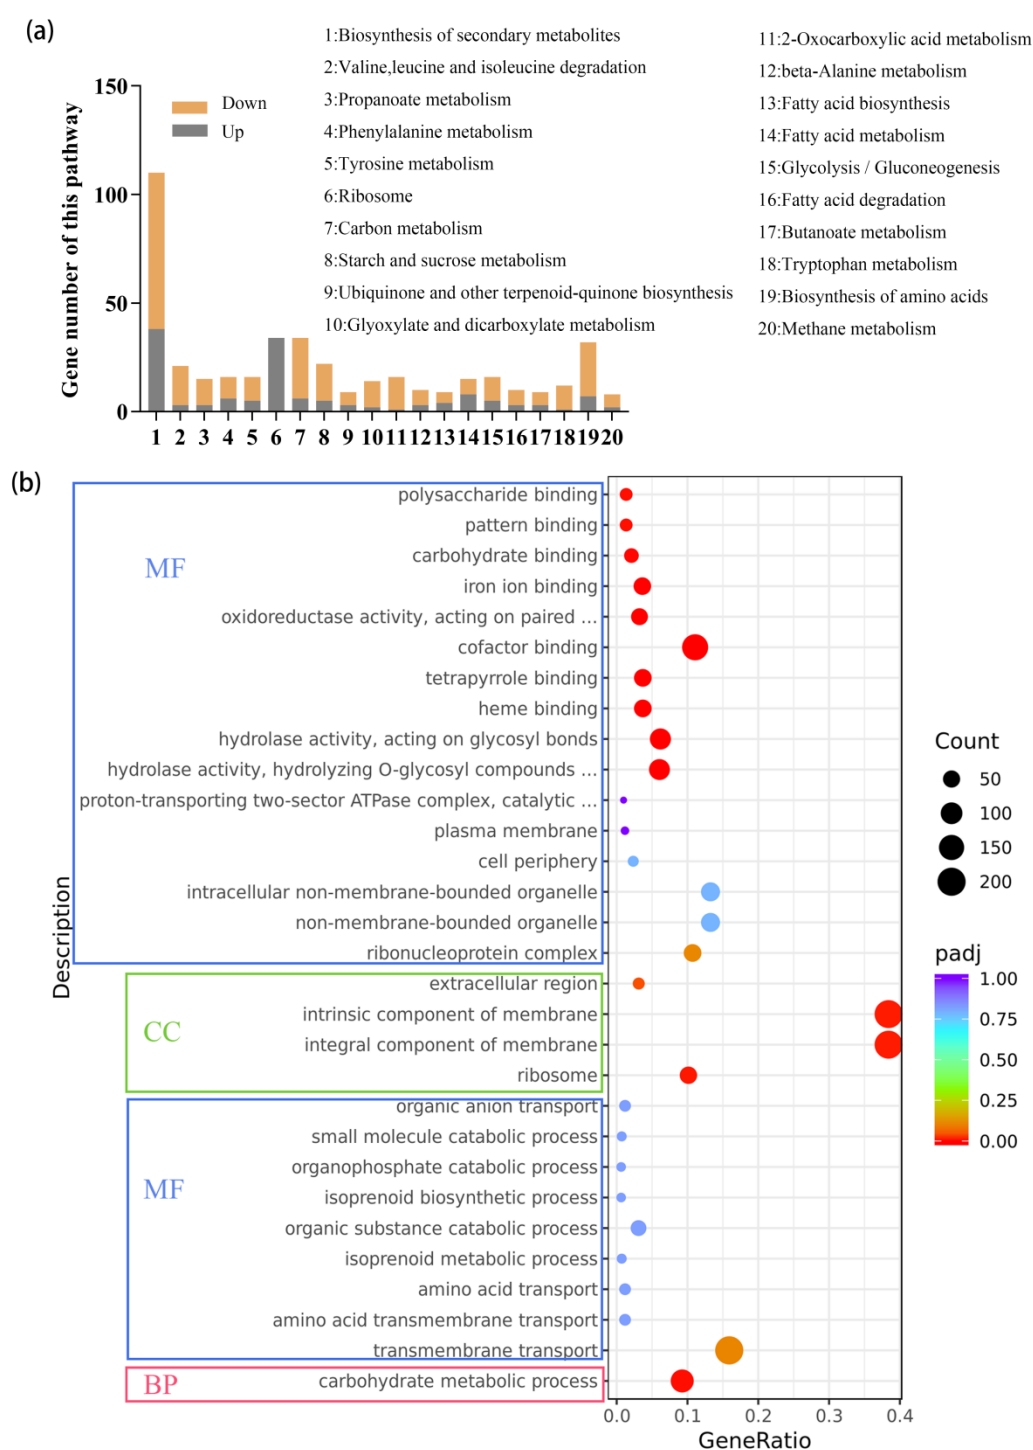

**Figure S3.** Transcriptome analysis of *P. oxalicum* 114-2 and  $\Delta PoPKA-C$ . (a) KEGG annotation and enrichment analysis were performed for differentially expressed genes. (b) GO enrichment analysis was performed for differentially expressed genes ( $P < 0.05$ ).

Table S1 Names and sequences of primers used in this study

| Primer names   | Primer sequences                                 |
|----------------|--------------------------------------------------|
| 3213-F0        | CAGCCTGAGGAATCGGGACG                             |
| 3213-F1        | ATTGCTGGACGGTGGTTAGT                             |
| 3213-F2        | AGCCGTACATCTAATCCACA                             |
| 3213HPH-R      | gctccttcaatatcagttaacgtcg AGGCCATAGACTTTGGAGAA   |
| 3213-F         | TGAAGAAGCGGGCGAACGAAG                            |
| 3213-R         | TTAGTGGGTGGACGAGTGAGGG                           |
| 3213HPH-F      | aaattccgtcaccagccctgggttgGCCCTGTATAATTTATGACG    |
| 3213-R2        | GAGCCAGACAAGTTTGAACG                             |
| 3213-R1        | ACATCAGCACTGCCAGTATG                             |
| hph-F          | CGACGTTAAGTATGATATTGAAGGAGC                      |
| hph-R          | CAACCCAGGGCTGGTGACGGAATTT                        |
| (ptrA)3213-R   | ATGGGATCCCGTAATCAATTGCCCCGAATGGCATT<br>GTTCCCGTC |
| ptrA-F         | GGGCAATTGATTACGGGATC                             |
| ptrA-R         | ATGGGGTGACGATGAGCCGC                             |
| PtrA(In)-R     | CCGCTCTTGCATCTTTGTTTG                            |
| (PtrA)HAClrB-R | GATCCCGTAATCAATTGCCC<br>CCGTTTCCCACATAGCATC      |
| Pbgl2-F        | CGCTTGTGCTCGCAGGGATG                             |
| Pbgl2-R        | CTTGCGGAAGTCGATTGGAAC                            |
| Pbgl2(In)-F    | TGGCACGGGCTTGATTGAG                              |
| (Pbgl2)ClrB-F  | CGTTCCAATCGACTTCGCCAAGATGTTCCACACCTT<br>TGAAGG   |
| 3213tz-F       | GACGGCACGTTCGGCTTGA                              |
| RT-act-F       | GTTCCATTCTCGCCTCCCTCT                            |
| RT-act-R       | AGAAGCACTTGCGGTGAACGA                            |
| RT-cbh1-F      | CCACCACCACTACCAGCAAGG                            |
| RT-cbh1-R      | GTAGCCAACACCACCGCACT                             |
| RT-egl-F       | ACCGCTGCTCAGACCACGAC                             |

|           |                       |
|-----------|-----------------------|
| RT-egl-R  | TGGGTCCCGAGTAGCCAACG  |
| RT-bgl1-F | CACCAACACCGGCTCAGTTA  |
| RT-bgl1-R | GGACATCCCAGTTGGACAGAT |
| RT-bgl2-F | GGCTGATGCGTACACGTTTGA |
| RT-bgl2-R | CGACATAAGTCACGCCGAAGC |
| RT-creA-F | ACAGTCCTGGTCAAGGTCAC  |
| RT-creA-R | GCCCGCCACGGAATTATTTG  |
| RT-clrB-F | TTGCCCGCATTTACGAAGCC  |
| RT-clrB-R | GTCTTGGGGTCCATTTTCGC  |
| RT-xlnR-F | GTGGTCCGAGCCTGCGAAAC  |
| RT-xlnR-R | CAGCGGTAGAGGGCGAGAAC  |
| RT-brlA-F | GGAACATCTCAAGCGGCACA  |
| RT-brlA-R | CAACTTGGAGCCGTAGATGG  |
| RT-fluC-F | GGTCTGCGACAAGCGGTTCA  |
| RT-stuA-F | GCGGCTCCTACACTTACACC  |
| RT-stuA-R | GAACGGCATCGTCGTCATCG  |
| RT-3213-F | CTCCCATCCTCAGCCCTCTC  |
| RT-3213-R | GGAGTCTGCGATTGCGATTG  |

---
